# Supplementary material for: Magnoflorine Attenuates Cerebral Ischemia-Induced Neuronal Injury via Autophagy/Sirt1/AMPK Signaling Pathway
Source: Hindawi journal article supplement (doi:10.1155/2022/2131561), 2022-09-10

## Supplementary materials

The raw data of WB are as follows:

**Fig. 4C**

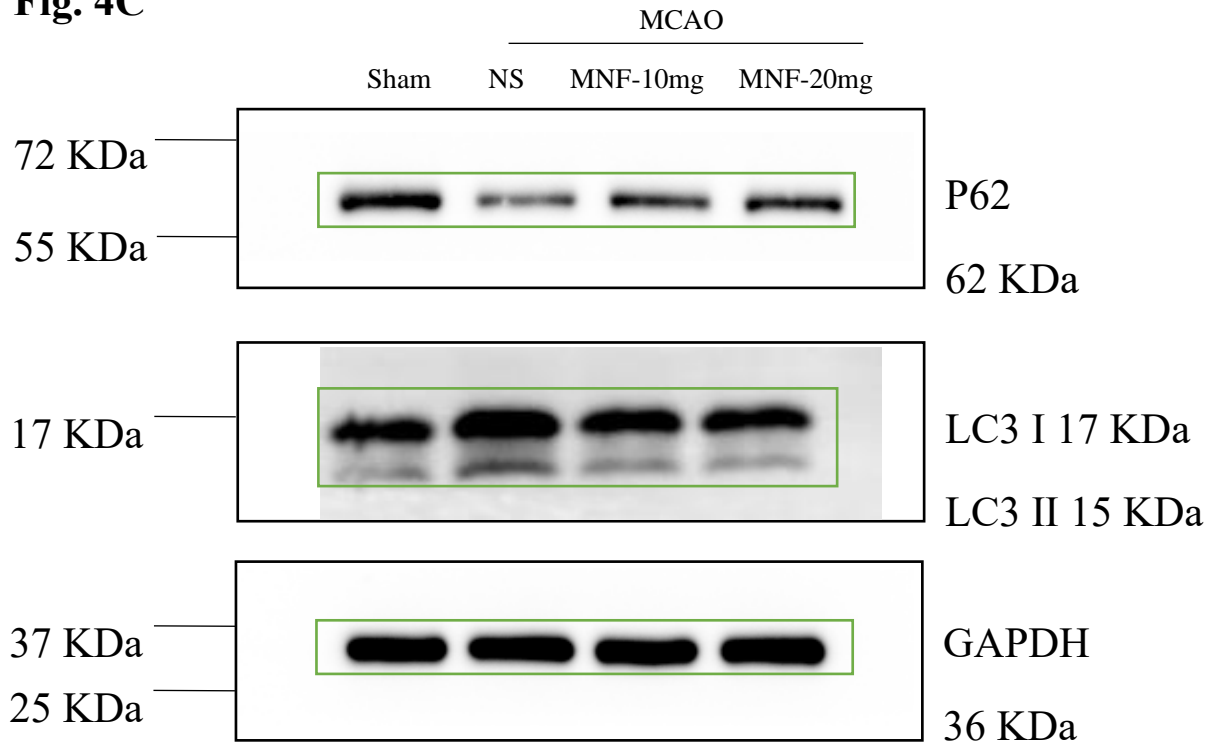

**Fig. 4F**

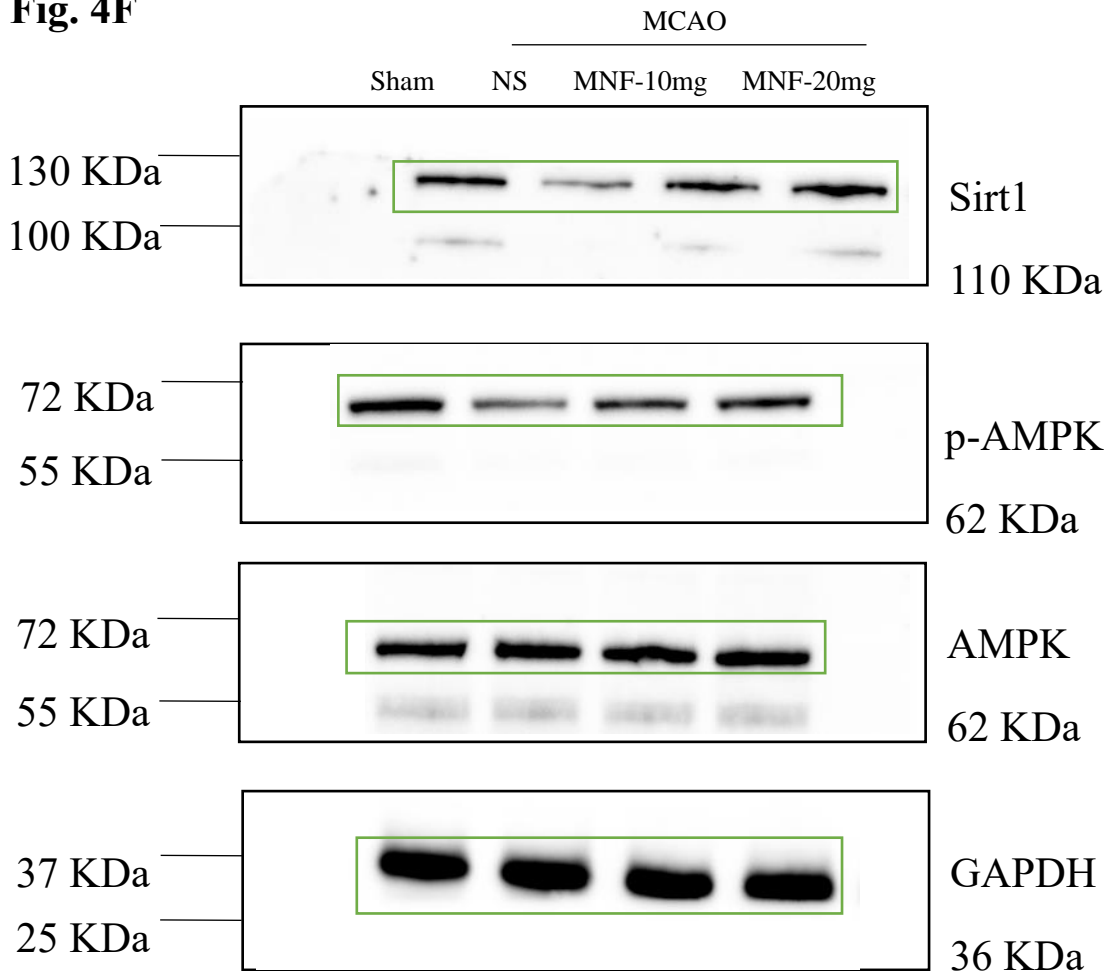

Supplement: f1 [file 2131561.f1.pdf]
